# Supplementary material for: Effects of Landscape Heterogeneity and Disperser Movement on Seed Dispersal
Source: MDPI journal article supplement (doi:10.3390/ecologies5020013), 2024-04-11
Supplement: s1 [file s1]

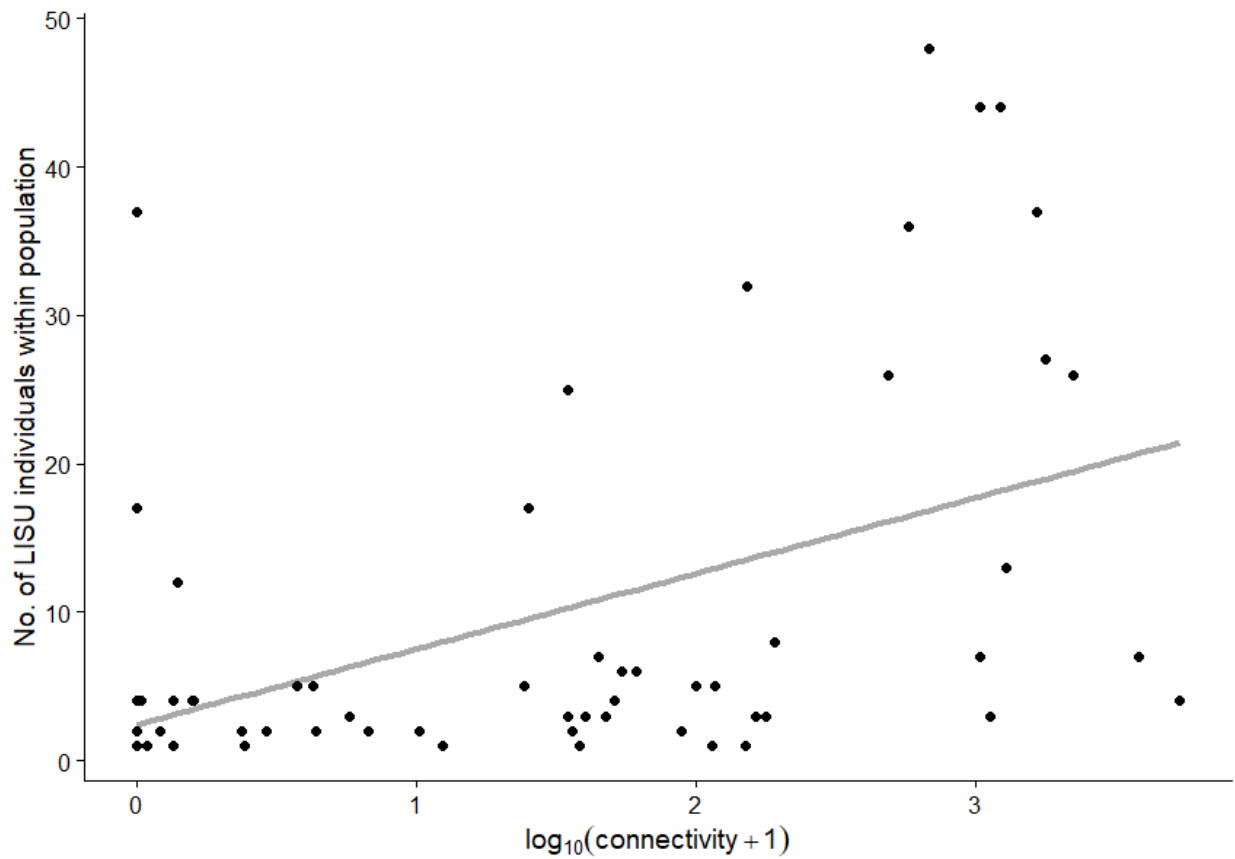

**Figure S2.** Number of *L. subcoriacea* (LISU) individuals within populations ( $n = 62$ ) versus the  $(\log_{10}+1)$  connectivity (Hanski 2001) of those populations (black dots). The gray line depicts a linear regression through these points:  $y = 2.42 + 5.09x$ ; adj.  $R^2 = 0.21$ ;  $p < 0.01$ .

Hanski, I. 2001. Spatially realistic theory of metapopulation ecology. *Naturwissenschaften* 88:372–381.
