# Supplementary material for: Effects of Landscape Heterogeneity and Disperser Movement on Seed Dispersal
Source: MDPI journal article supplement (doi:10.3390/ecologies5020013), 2024-04-11
Supplement: s1 [file s1]

**Table S1.** Seasonal avian frugivores on Fort Liberty, NC that had sufficient observations for spatial occupancy estimates (Wall et al. *in revision*). The mean ( $\pm$ SD), across LISU locations, for the Quasi-SDE components, Quantity, and Quality, are also shown. Study species are shown in bold.

| Common Name                  | Scientific Name                          | Quantity             | Quality              | Quasi-SDE            |
|------------------------------|------------------------------------------|----------------------|----------------------|----------------------|
| American crow                | <i>Corvus brachyrhynchos</i>             | 1.352 (2.467)        | 0.151 (0.041)        | 0.204 (0.425)        |
| <b>American robin</b>        | <b><i>Turdus migratorius</i></b>         | <b>0.184 (0.352)</b> | <b>0.08 (0.03)</b>   | <b>0.016 (0.033)</b> |
| <b>blue jay</b>              | <b><i>Cyanocitta cristata</i></b>        | <b>0.136 (0.237)</b> | <b>0.111 (0.029)</b> | <b>0.015 (0.026)</b> |
| Carolina chickadee           | <i>Poecile carolinensis</i>              | 0.051 (0.089)        | 0.155 (0.039)        | 0.007 (0.014)        |
| downy woodpecker             | <i>Picoides pubescens</i>                | 0.029 (0.061)        | 0.055 (0.02)         | 0.002 (0.005)        |
| <b>eastern bluebird</b>      | <b><i>Sialis sialis</i></b>              | <b>0.052 (0.126)</b> | <b>0.064 (0.018)</b> | <b>0.004 (0.009)</b> |
| eastern kingbird             | <i>Tyrannus tyrannus</i>                 | 0.036 (0.088)        | 0.034 (0.01)         | 0.001 (0.003)        |
| eastern towhee               | <i>Pipilo erythrophthalmus</i>           | 0.227 (0.394)        | 0.305 (0.096)        | 0.069 (0.126)        |
| indigo bunting               | <i>Passerina cyanea</i>                  | 0.083 (0.243)        | 0.403 (0.179)        | 0.038 (0.117)        |
| northern flicker             | <i>Colaptes auratus auratus</i>          | 0.286 (0.547)        | 0.105 (0.039)        | 0.028 (0.053)        |
| pine warbler                 | <i>Setophaga pinus</i>                   | 0.041 (0.079)        | 0.137 (0.035)        | 0.006 (0.012)        |
| pileated woodpecker          | <i>Dryocopus pileatus</i>                | 0.466 (0.813)        | 0.073 (0.025)        | 0.033 (0.062)        |
| red-cockaded woodpecker      | <i>Dryobates borealis</i>                | 0.018 (0.041)        | 0.022 (0.006)        | 0 (0.001)            |
| <b>red-headed woodpecker</b> | <b><i>Melanerpes erythrocephalus</i></b> | <b>0.165 (0.306)</b> | <b>0.123 (0.032)</b> | <b>0.02 (0.036)</b>  |
| summer tanager               | <i>Piranga rubra</i>                     | 0.029 (0.048)        | 0.061 (0.019)        | 0.002 (0.003)        |
| tufted titmouse              | <i>Baeolophus bicolor</i>                | 0.055 (0.095)        | 0.151 (0.064)        | 0.009 (0.018)        |
| <b>white-eyed vireo</b>      | <b><i>Vireo griseus</i></b>              | <b>0.025 (0.045)</b> | <b>0.071 (0.025)</b> | <b>0.002 (0.004)</b> |
| yellow-billed cuckoo         | <i>Coccyzus americanus</i>               | 0.04 (0.086)         | 0.046 (0.013)        | 0.002 (0.004)        |

$$\text{Quasi-SDE} = \text{quantity} \times \text{quality}$$

$$\text{Quasi-SDE} = (1/[n_F/G_C] \times O_P) \times (\text{mean} [\text{spatial } O_B \times \text{spatial } S_B])$$

Quantity is the product of (1) the inverse quotient of  $n_F$ , the number of fruits for a given LISU cell and  $G_C$ , the gut capacity (number of fruits) of a given bird species and (2)  $O_P$  is the species-specific occupancy value for a given LISU cell. The Quality component of the Quasi-SDE is calculated as follows (1) the product of the following two items (A)  $O_B$  is a occupancy raster (species-specific), and (B)  $S_B$  is the *L. subcoriacea* suitability raster (species-specific) is calculated, and then (2) the mean value (AB product) of the cells that were within species-specific buffered distances of each LISU was calculated; the species-buffered distance was the mean dispersal distance of a bird species as determined by a linear regression with a predictor of bird mass (g). The mean value per species across LISU with fruit (n=39) for Quantity and Quality was then calculated (reported above).
