# Supplementary material for: Effects of Landscape Heterogeneity and Disperser Movement on Seed Dispersal
Source: MDPI journal article supplement (doi:10.3390/ecologies5020013), 2024-04-11
Supplement: s1 [file s1]

**Table S3.** Seed dispersal kernels for avian disperser species based on landscape permeability or straight path-based movements using *T. migratorius* physiological parameters for all species. Means of 30 simulations are shown with standard errors in parentheses for each species by movement method. Dispersal kernels were fit with a two-parameter (scale, shape) Weibull distribution. The standard errors of the parameters were estimated using a Hessian matrix and maximum likelihood procedures. Kurtosis was estimated using the kernel parameters and the method described by Austerlitz et al. (2004).

| Travel        | Species                   | Scale         | Shape       | Kurtosis    |
|---------------|---------------------------|---------------|-------------|-------------|
| Permeability  | <i>C. cristata</i>        | 149.5 (10.65) | 0.72 (0.02) | 18.2 (2.08) |
|               | <i>M. erythrocephalus</i> | 113.2 (8.26)  | 0.71 (0.02) | 19.9 (2.26) |
|               | <i>S. sialis</i>          | 90 (6.89)     | 0.66 (0.02) | 25.9 (2.98) |
|               | <i>T. migratorius</i>     | 93.6 (6.17)   | 0.74 (0.02) | 16.4 (1.73) |
|               | <i>V. griseus</i>         | 114.5 (8.82)  | 0.63 (0.02) | 30.4 (3.47) |
| Straight path | <i>C. cristata</i>        | 138.3 (9.68)  | 0.72 (0.02) | 18.4 (2.03) |
|               | <i>M. erythrocephalus</i> | 105 (7.25)    | 0.73 (0.02) | 17.5 (1.91) |
|               | <i>S. sialis</i>          | 110.2 (9.62)  | 0.59 (0.02) | 40.1 (5.2)  |
|               | <i>T. migratorius</i>     | 100.7 (6.46)  | 0.75 (0.02) | 15.8 (1.63) |
|               | <i>V. griseus</i>         | 107.9 (8.56)  | 0.63 (0.02) | 31 (3.64)   |

Austerlitz, F., C. W. Dick, C. Dutech, E. K. Klein, S. Oddou-Muratorio, P. E. Smouse, and V. L. Sork. 2004. Using genetic markers to estimate the pollen dispersal curve. *Molecular Ecology* 13:937–954.
