# Supplementary material for: Effects of Landscape Heterogeneity and Disperser Movement on Seed Dispersal
Source: MDPI journal article supplement (doi:10.3390/ecologies5020013), 2024-04-11
Supplement: s1 [file s1]

**Table S11.** Nearest neighbor distance (NND) and connectivity (S) (Hanski 2001) for the *L. subcoriacea* sub-element occurrences (EO Number; aka populations) at Fort Liberty that had stems ( $n = 62$ ).

| EO Number | NND (m)  | S       |
|-----------|----------|---------|
| LISU001F  | 1087.28  | 0.41    |
| LISU002A  | 1152.11  | 0.22    |
| LISU002B  | 1042.40  | 0.36    |
| LISU003C  | 2111.85  | 0.00    |
| LISU004A  | 125.37   | 1788.55 |
| LISU004B  | 125.37   | 1659.55 |
| LISU004C  | 209.53   | 1037.02 |
| LISU004F  | 1011.08  | 1.92    |
| LISU007B  | 390.62   | 3.26    |
| LISU007D  | 247.67   | 33.69   |
| LISU008A  | 419.26   | 5.70    |
| LISU008C  | 496.22   | 0.61    |
| LISU008D  | 114.62   | 162.06  |
| LISU008E  | 114.62   | 191.33  |
| LISU008F  | 309.60   | 53.11   |
| LISU011A  | 317.09   | 176.91  |
| LISU011B  | 317.09   | 44.00   |
| LISU011C  | 160.49   | 24.24   |
| LISU011D  | 160.49   | 1127.61 |
| LISU011E  | 459.84   | 115.51  |
| LISU016A  | 2839.48  | 0.00    |
| LISU017A  | 158.68   | 3848.11 |
| LISU017B  | 222.63   | 575.70  |
| LISU017C  | 158.68   | 679.09  |
| LISU018A  | 554.77   | 33.94   |
| LISU018C  | 554.77   | 88.12   |
| LISU023A  | 441.23   | 11.42   |
| LISU023B  | 441.23   | 2.73    |
| LISU024A  | 17001.67 | 0.00    |
| LISU025A  | 234.05   | 150.82  |
| LISU025D  | 130.00   | 5388.43 |
| LISU025E  | 130.00   | 1292.58 |
| LISU025G  | 142.40   | 2240.87 |
| LISU026A  | 149.76   | 99.41   |
| LISU026B  | 1044.62  | 1.42    |
| LISU027A  | 2664.49  | 0.00    |
| LISU028A  | 2815.65  | 0.00    |
| LISU029A  | 354.58   | 23.26   |
| LISU029B  | 354.58   | 50.20   |

| EO Number | NND (m) | S       |
|-----------|---------|---------|
| LISU032A  | 41.57   | 1032.27 |
| LISU032B  | 18.28   | 1225.43 |
| LISU032C  | 18.28   | 487.09  |
| LISU032D  | 429.80  | 60.47   |
| LISU032E  | 1092.13 | 0.10    |
| LISU033A  | 1093.69 | 0.35    |
| LISU033B  | 730.77  | 4.76    |
| LISU033C  | 601.94  | 3.37    |
| LISU033D  | 601.94  | 35.11   |
| LISU035A  | 508.58  | 9.24    |
| LISU035B  | 155.68  | 112.79  |
| LISU035C  | 155.68  | 46.37   |
| LISU037A  | 4290.58 | 0.00    |
| LISU048A  | 149.76  | 149.36  |
| LISU049A  | 1087.28 | 0.58    |
| LISUNEW02 | 2858.34 | 0.00    |
| LISUNEW03 | 2858.34 | 0.00    |
| LISUNEW04 | 9567.28 | 0.00    |
| LISUNEW05 | 1044.24 | 0.04    |
| LISUNEW06 | 297.62  | 39.00   |
| LISUNEW07 | 202.01  | 37.54   |
| LISUNEW08 | 1044.24 | 1.36    |
| LISUNEW09 | 3814.52 | 0.00    |

*L. subcoriacea* subelement occurrence data were acquired from the North Carolina Natural Heritage Program (2018).

North Carolina Natural Heritage Program. 2018. Natural Heritage Element Occurrences (NHEO):

*Lindera subcoriacea*. North Carolina Department of Natural and Cultural Resources.

Raleigh, NC. North Carolina Department of Natural and Cultural Resources, Raleigh, NC.
