# Supplementary material for: Effects of Landscape Heterogeneity and Disperser Movement on Seed Dispersal
Source: MDPI journal article supplement (doi:10.3390/ecologies5020013), 2024-04-11
Supplement: s1 [file s1]

**Table S8.** Mean percentage of foraged seeds not dispersed (Not Disp.) and dispersed seeds dispersed during flight (Flight) for the five study species by movement method; standard error of the mean is presented within parentheses. Thirty experiments per species per movement method. These experiments use *T. migratorius* physiological parameters (main text, Table 1) for all bird species.

|                           | Permeability |        |   | Straight path |        |   |     | Permeability |        |   | Straight path |        |    |        |
|---------------------------|--------------|--------|---|---------------|--------|---|-----|--------------|--------|---|---------------|--------|----|--------|
| Species                   | Not Disp.    |        |   | Not Disp.     |        |   | U   | Flight       |        |   | Flight        |        |    | U      |
| <i>C. cristata</i>        | 86.2         | (0.67) | a | 86.6          | (0.47) | a | 447 | 0.93         | (0.44) | a | 1.13          | (0.61) | ab | 461    |
| <i>M. erythrocephalus</i> | 88.0         | (0.51) | a | 86.6          | (0.65) | a | 562 | 0.9          | (0.39) | a | 1.03          | (0.5)  | ab | 429.5  |
| <i>S. sialis</i>          | 87.8         | (0.61) | a | 87.5          | (0.56) | a | 459 | 1.52         | (0.59) | a | 2.07          | (0.59) | a  | 373.5  |
| <i>T. migratorius</i>     | 88.3         | (0.6)  | a | 86.8          | (0.56) | a | 568 | 0.91         | (0.44) | a | 0.7           | (0.37) | ab | 439.5  |
| <i>V. griseus</i>         | 86.5         | (0.68) | a | 86.9          | (0.48) | a | 412 | 2.06         | (0.62) | a | 0.09          | (0.09) | b  | 618*** |

Results of Wilcoxon–Mann–Whitney tests (U) comparing percentage of seeds not dispersed or dispersed during flight between landscape permeability and straight path movement experiments for each bird species (\*\*\*  $P < 0.001$ , \*\*  $P < 0.01$ , \*  $P < 0.05$ ).

The percentage of seeds not dispersed and dispersed during flight are presented as the mean value (%) with standard error of the mean in parentheses. Different letters within movement methods represent species' differences using Dunn's Test post hoc comparisons ( $\alpha = 0.05$ ) on Kruskal–Wallis analysis of the given variable between species.
