# Supplementary material for: Effects of Landscape Heterogeneity and Disperser Movement on Seed Dispersal
Source: MDPI journal article supplement (doi:10.3390/ecologies5020013), 2024-04-11
Supplement: s1 [file s1]

**Table S4.** Mean number of seeds dispersed (SDE<sub>Q</sub>) and mean relative percentage of total seeds dispersed (across experiments for all species; % Disp.) for the five study species; standard error of the mean is presented within parentheses. Thirty experiments per species by movement method. These experiments use *T. migratorius* physiological parameters (main text, Table 1) for all bird species.

| Species                   | Permeability | Straight path  |          | Permeability | Straight path  |          |
|---------------------------|--------------|----------------|----------|--------------|----------------|----------|
|                           | SDEq         | SDEq           | U        | % Disp.      | % Disp.        | U        |
| <i>C. cristata</i>        | 102.7 (5.74) | a 110.1 (5.39) | a 384    | 18.16 (1.04) | a 18.28 (0.87) | a 445.5  |
| <i>M. erythrocephalus</i> | 106.8 (5.83) | a 120.4 (7.28) | ab 376.5 | 18.65 (0.86) | a 19.88 (1.07) | ab 383.5 |
| <i>S. sialis</i>          | 112.7 (6.9)  | a 117.2 (6.12) | ab 408   | 19.88 (1.22) | a 19.39 (0.85) | ab 454   |
| <i>T. migratorius</i>     | 124.4 (7.46) | a 138.8 (6.44) | b 331.5  | 21.59 (1.10) | a 22.99 (0.89) | b 360    |
| <i>V. griseus</i>         | 123.6 (5.93) | a 118.1 (6.96) | ab 495   | 21.73 (0.98) | a 19.46 (1.00) | ab 560   |

Results of Wilcoxon–Mann–Whitney tests (U) comparing SDE<sub>Q</sub> or proportion dispersed permeability and straight path movement experiments for each bird species (\*\*\* P<0.001, \*\* P<0.01, \* P<0.05).

Different letters within movement methods represent species' differences using Dunn's Test post hoc comparisons ( $\alpha = 0.05$ ) on Kruskal–Wallis analysis of the given variable between species.
