# Supplementary material for: Effects of Landscape Heterogeneity and Disperser Movement on Seed Dispersal
Source: MDPI journal article supplement (doi:10.3390/ecologies5020013), 2024-04-11
Supplement: s1 [file s1]

**Table S6.** The product (SDE) of the mean number of dispersed seeds ( $SDE_Q$ ) and the mean proportion of seeds dispersed to suitable locations ( $SDE_D$ ), for the five study species for experiments by movement method; standard error of the mean is presented within parentheses. Thirty experiments per species per movement method. These experiments use *T. migratorius* physiological parameters (main text, Table 1) for all bird species.

| Species                   | Permeability |   | Straight path |    | U     |
|---------------------------|--------------|---|---------------|----|-------|
|                           | SDE          |   | SDE           |    |       |
| <i>C. cristata</i>        | 60.3 (4.52)  | a | 74.8 (5.11)   | ab | 315*  |
| <i>M. erythrocephalus</i> | 61.5 (5.01)  | a | 70.6 (5.03)   | ab | 351   |
| <i>S. sialis</i>          | 63.1 (6.68)  | a | 61 (4.4)      | a  | 431.5 |
| <i>T. migratorius</i>     | 88.8 (6.32)  | b | 104.2 (5.21)  | c  | 292*  |
| <i>V. griseus</i>         | 89.3 (5)     | b | 82.7 (6.26)   | bc | 499.5 |

Results of Wilcoxon–Mann–Whitney tests (U) comparing SDE between landscape permeability and straight path movement experiments for each bird species (\*\*\*  $P < 0.001$ , \*\*  $P < 0.01$ , \*  $P < 0.05$ ).

SDE is presented as the mean value with standard error of the mean in parentheses. Different letters within movement methods represent species' differences using Dunn's Test post hoc comparisons ( $\alpha = 0.05$ ) on Kruskal–Wallis analysis of SDE between species.
