# Supplementary material for: Effects of Landscape Heterogeneity and Disperser Movement on Seed Dispersal
Source: MDPI journal article supplement (doi:10.3390/ecologies5020013), 2024-04-11
Supplement: s1 [file s1]

**Table S9.** Comparison of seed dispersal effectiveness (SDE) and SDE subcomponents (SDE<sub>Q</sub>, SDE<sub>D</sub>) between experiments (across species) using distinct or *T. migratorius* physiological parameters by movement method. The SDE variables are presented as the mean value, across species, with standard error of the mean in parentheses.

| <b>Movement</b> | <b>Variable</b>  | <b>N<sub>1</sub></b> | <b>N<sub>2</sub></b> | <b>U</b>  | <b>Distinct</b> | <b><i>T. migratorius</i></b> |
|-----------------|------------------|----------------------|----------------------|-----------|-----------------|------------------------------|
| Permeability    | SDE <sub>Q</sub> | 150                  | 150                  | 7530***   | 79.6 (4.22)     | 114.0 (6.37)                 |
|                 | SDE <sub>D</sub> | 150                  | 150                  | 10367     | 0.60 (0.03)     | 0.62 (0.03)                  |
|                 | SDE              | 150                  | 150                  | 7499.5*** | 49.6 (3.20)     | 72.6 (5.50)                  |
| Straight Path   | SDE <sub>Q</sub> | 150                  | 150                  | 6288.5*** | 76.0 (4.10)     | 120.9 (6.44)                 |
|                 | SDE <sub>D</sub> | 150                  | 150                  | 10121.5   | 0.60 (0.04)     | 0.64 (0.02)                  |
|                 | SDE              | 150                  | 150                  | 6538***   | 48.9 (3.46)     | 78.6 (5.20)                  |

Results of Wilcoxon–Mann–Whitney tests (U) comparing SDE variables between experiments using distinct and *T. migratorius* physiological parameters by movement method (\*\*\* P<0.001, \*\* P<0.01, \* P<0.05).
