# Supplementary material for: Effects of Landscape Heterogeneity and Disperser Movement on Seed Dispersal
Source: MDPI journal article supplement (doi:10.3390/ecologies5020013), 2024-04-11
Supplement: s1 [file s1]

**Table S10.** Comparison of seed dispersal effectiveness (SDE) and SDE subcomponents (SDE<sub>Q</sub>, SDE<sub>D</sub>) within species between experiments using distinct or *T. migratorius* physiological parameters by movement method. The SDE variables are presented as the mean value, across species, with standard error of the mean in parentheses.

| Travel        | Species                   | What             | N <sub>1</sub> | N <sub>2</sub> | U       | Distinct      | <i>T. migratorius</i> |
|---------------|---------------------------|------------------|----------------|----------------|---------|---------------|-----------------------|
| Permeability  | <i>C. cristata</i>        | SDE <sub>Q</sub> | 30             | 30             | 635*    | 135.4 (8.36)  | 102.7 (5.74)          |
|               | <i>M. erythrocephalus</i> |                  | 30             | 30             | 325     | 93.3 (4.91)   | 106.8 (5.83)          |
|               | <i>S. sialis</i>          |                  | 30             | 30             | 1***    | 22.1 (1.29)   | 112.7 (6.9)           |
|               | <i>T. migratorius</i>     |                  | 30             | 30             | 590     | 141.4 (5.95)  | 124.4 (7.46)          |
|               | <i>V. griseus</i>         |                  | 30             | 30             | 0***    | 5.7 (0.57)    | 123.6 (5.93)          |
|               | <i>C. cristata</i>        | SDE <sub>D</sub> | 30             | 30             | 419     | 0.565 (0.03)  | 0.59 (0.031)          |
|               | <i>M. erythrocephalus</i> |                  | 30             | 30             | 470     | 0.562 (0.029) | 0.562 (0.03)          |
|               | <i>S. sialis</i>          |                  | 30             | 30             | 301     | 0.445 (0.028) | 0.535 (0.03)          |
|               | <i>T. migratorius</i>     |                  | 30             | 30             | 517     | 0.746 (0.021) | 0.712 (0.021)         |
|               | <i>V. griseus</i>         |                  | 30             | 30             | 443.5   | 0.677 (0.056) | 0.72 (0.019)          |
|               | <i>C. cristata</i>        | SDE              | 30             | 30             | 588     | 76.6 (6.06)   | 60.3 (4.52)           |
|               | <i>M. erythrocephalus</i> |                  | 30             | 30             | 385.5   | 53.7 (4.21)   | 61.5 (5.01)           |
|               | <i>S. sialis</i>          |                  | 30             | 30             | 3.5***  | 9.7 (0.75)    | 63.1 (6.68)           |
|               | <i>T. migratorius</i>     |                  | 30             | 30             | 614     | 104.2 (4.5)   | 88.8 (6.32)           |
|               | <i>V. griseus</i>         |                  | 30             | 30             | 0***    | 3.8 (0.49)    | 89.3 (5)              |
| Straight Path | <i>C. cristata</i>        | SDE <sub>Q</sub> | 30             | 30             | 529.5   | 122.4 (6.93)  | 110.1 (5.39)          |
|               | <i>M. erythrocephalus</i> |                  | 30             | 30             | 221.5** | 87.1 (4.24)   | 120.4 (7.28)          |
|               | <i>S. sialis</i>          |                  | 30             | 30             | 0***    | 21.4 (1.72)   | 117.2 (6.12)          |
|               | <i>T. migratorius</i>     |                  | 30             | 30             | 477     | 143 (7.05)    | 138.8 (6.44)          |
|               | <i>V. griseus</i>         |                  | 30             | 30             | 0***    | 6 (0.55)      | 118.1 (6.96)          |
|               | <i>C. cristata</i>        | SDE <sub>D</sub> | 30             | 30             | 305     | 0.574 (0.035) | 0.674 (0.031)         |
|               | <i>M. erythrocephalus</i> |                  | 30             | 30             | 386.5   | 0.552 (0.03)  | 0.584 (0.025)         |
|               | <i>S. sialis</i>          |                  | 30             | 30             | 462     | 0.508 (0.037) | 0.518 (0.026)         |
|               | <i>T. migratorius</i>     |                  | 30             | 30             | 487     | 0.763 (0.021) | 0.752 (0.019)         |
|               | <i>V. griseus</i>         |                  | 30             | 30             | 388     | 0.587 (0.067) | 0.68 (0.02)           |
|               | <i>C. cristata</i>        | SDE              | 30             | 30             | 436.5   | 73 (6.55)     | 74.8 (5.11)           |
|               | <i>M. erythrocephalus</i> |                  | 30             | 30             | 251.5*  | 49.8 (4.29)   | 70.6 (5.03)           |
|               | <i>S. sialis</i>          |                  | 30             | 30             | 2***    | 10.8 (1.19)   | 61 (4.4)              |
|               | <i>T. migratorius</i>     |                  | 30             | 30             | 477.5   | 107 (4.79)    | 104.2 (5.21)          |
|               | <i>V. griseus</i>         |                  | 30             | 30             | 0***    | 3.7 (0.46)    | 82.7 (6.26)           |

Results of Wilcoxon–Mann–Whitney tests (U) comparing SDE variables between experiments using distinct and *T. migratorius* physiological parameters by movement method (\*\*\* P<0.001, \*\* P<0.01, \* P<0.05).
