# Supplementary material for: Effects of Landscape Heterogeneity and Disperser Movement on Seed Dispersal
Source: MDPI journal article supplement (doi:10.3390/ecologies5020013), 2024-04-11
Supplement: s1 [file s1]

**Table S2.** Wilcoxon rank sum tests for Quasi-SDE and subcomponents. We failed to reject the  $H_0$  that our study species differed from the other observed frugivores in Quasi-SDE and component values. This suggests that aggregated results for the full complement of species would yield a similar interpretation of *L. subcoriacea* seed dispersal as that generated using our five study species. For Quasi-SDE calculations see Table S1.

| Variable  | W                    | p value |
|-----------|----------------------|---------|
| Quantity  | 35 <sub>5,13</sub>   | 0.844   |
| Quality   | 30 <sub>5,13</sub>   | 0.844   |
| Quasi-SDE | 32.5 <sub>5,13</sub> | 1.000   |
