# Supplementary material for: Effects of Landscape Heterogeneity and Disperser Movement on Seed Dispersal
Source: MDPI journal article supplement (doi:10.3390/ecologies5020013), 2024-04-11
Supplement: s1 [file s1]

**Table S5.** Mean proportion of seeds deposited in suitable *L. subcoriacea* habitat (SDE<sub>D</sub>) for the five study species by movement method; standard error of the mean is presented within parentheses. Thirty experiments per species by movement method. These experiments use *T. migratorius* physiological parameters (main text, Table 1) for all bird species.

| Species                   | Permeability     |   | Straight path    |    | U    |
|---------------------------|------------------|---|------------------|----|------|
|                           | SDE <sub>D</sub> |   | SDE <sub>D</sub> |    |      |
| <i>C. cristata</i>        | 0.59 (0.03)      | a | 0.67 (0.03)      | ab | 302* |
| <i>M. erythrocephalus</i> | 0.56 (0.03)      | a | 0.58 (0.02)      | ac | 390  |
| <i>S. sialis</i>          | 0.54 (0.03)      | a | 0.52 (0.03)      | c  | 475  |
| <i>T. migratorius</i>     | 0.71 (0.02)      | b | 0.75 (0.02)      | b  | 378  |
| <i>V. griseus</i>         | 0.72 (0.02)      | b | 0.68 (0.02)      | ab | 527  |

Results of Wilcoxon–Mann–Whitney tests (U) comparing SDE<sub>D</sub> between landscape permeability and straight path movement experiments for each bird species (\*\*\* P<0.001, \*\* P<0.01, \* P<0.05).

SDE<sub>D</sub> is presented as the mean value with standard error of the mean in parentheses. Different letters within movement methods represent species' differences using Dunn's Test post hoc comparisons ( $\alpha = 0.05$ ) on Kruskal–Wallis analysis of SDE<sub>D</sub> between species.
